# Supplementary material for: Reductive responsive micelle overcoming multidrug resistance of breast cancer by co-delivery of DOX and specific antibiotic
Source: Royal Society of Chemistry journal article supplement (doi:10.1039/c9tb01093a), 2019-01-01
Supplement: c9tb01093a1.pdf [file c9tb01093a1.pdf]

## Supporting Information

# The reductive responsive micelle inverting multidrug resistance of breast cancer by co-delivery DOX and specific antibiotic

Yani Cui<sup>1</sup>, Yuedi Yang<sup>1</sup>, Mengcheng Ma<sup>1</sup>, Yang Xu<sup>1</sup>, Junhui Sui<sup>1</sup>, Huifang Li<sup>2</sup>, Jie Liang<sup>1</sup>, Yong Sun\*<sup>1</sup>, Yujiang Fan<sup>1</sup>, Xingdong Zhang<sup>1</sup>

<sup>1</sup> National Engineering Research Center for Biomaterials, Sichuan University, 29 Wangjiang Road, Chengdu 610064, China

<sup>2</sup> Research Core Facility, West China Hospital, Sichuan University, Building B2, No. 88, Keyuan south street, High-Tech District, Chengdu 610041, China

### Corresponding Author

Yong Sun\*

Room 803, Biomaterials Building, Sichuan University, Chengdu 610064, China

Tel: +86-28-85417654 Fax: +86-28-85417654 e-mail: sunyong8702@scu.edu.cn

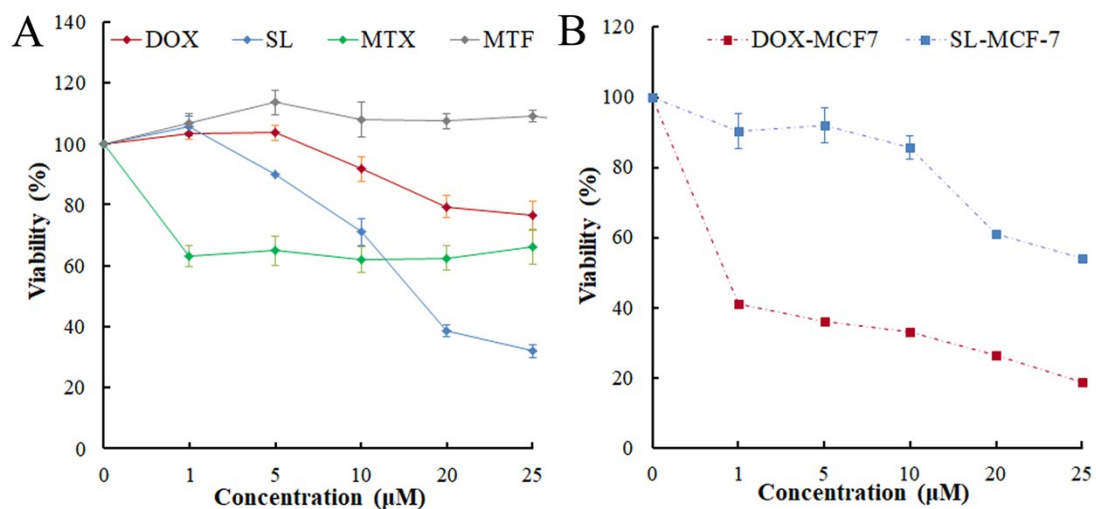

**Figure S1.** (A) Viability of adherent A/MCF-7 after culturing with free DOX, SL, MTX or MTF in different concentration for 72 h. (B) Viability of adherent MCF-7 after culturing with free DOX or SL in different concentration for 72 h. Data are showed as Mean  $\pm$  SD by t-test (n=5).

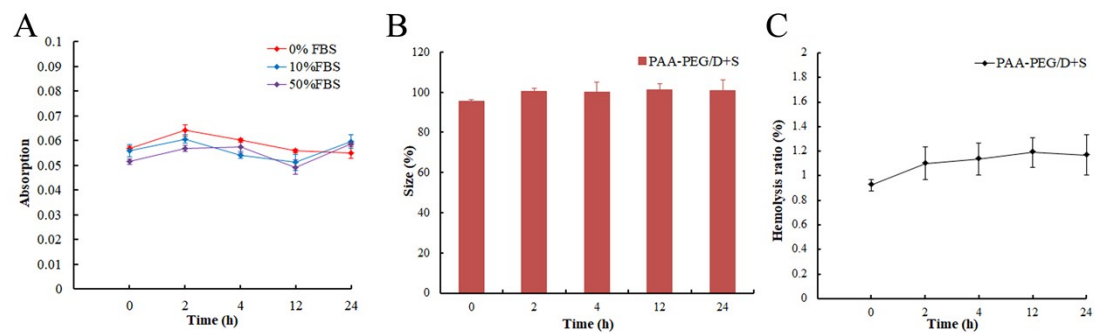

**Figure S2.** (A) Stability evaluation of PAA-PEG/D+S micelles in DMEM medium with 10% FBS. (B) Serum stability of PAA-PEG/D+S micelles in different concentration of FBS. (C) Hemolysis ratio of PAA-PEG/D+S micelles in 2% red blood cells. Data was showed as Mean  $\pm$  SD by t-test (n=3).

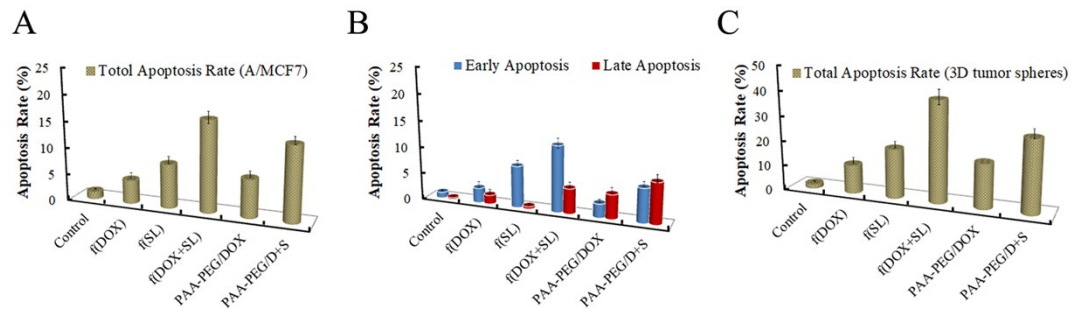

**Figure S3.** (A) The total apoptosis rate of A/MCF-7 cells after treatment with various formulations for 48 h. (B) The early apoptosis rate and late apoptosis rate of A/MCF-7 cells after treatment with various formulations for 48 h. (C) The total apoptosis rate of tumor spheres after treatment with various formulations for 24 h. Data are showed as Mean  $\pm$  SD by t-test (n=3).

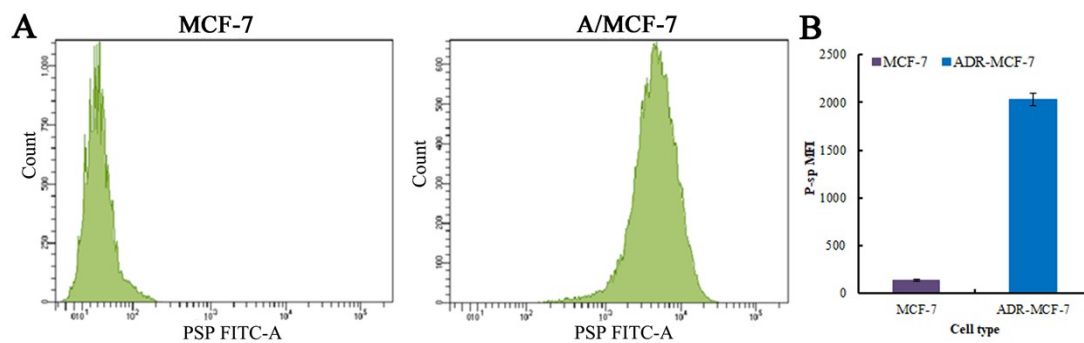

**Figure S4.** (A) Flow cytometry analyses of expression of P glycoprotein (P-sp) in MCF-7 and A/MCF-7 cells. (B) Histogram of mean fluorescence intensity (MFI) of the expression of P-sp in MCF-7 and A/MCF-7 cells. Data are showed as Mean  $\pm$  SD by t-test (n=3).

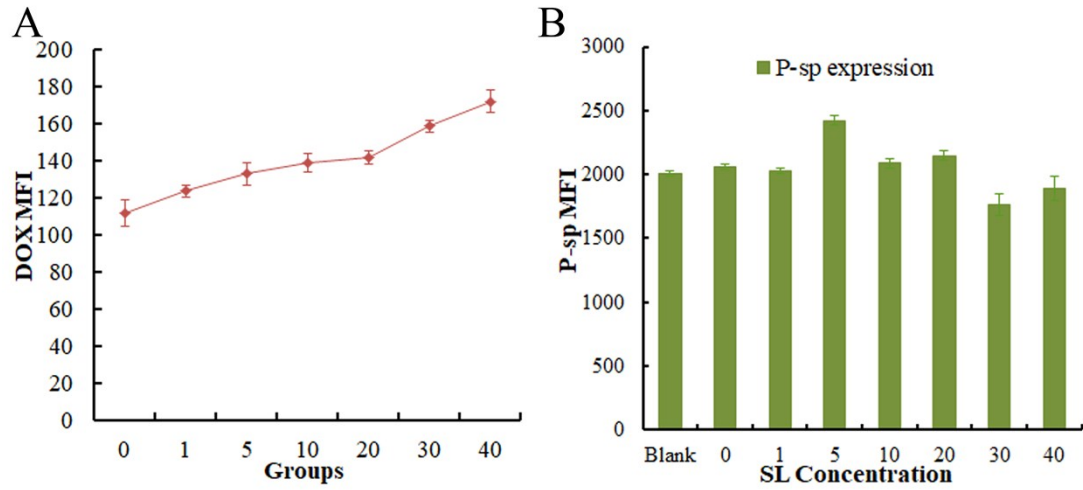

**Figure S5.** (A) The represented the mean fluorescence intensity (MFI) of DOX in A/MCF-7 cells with various concentrations of SL at 20  $\mu$ M DOX. (B) The represented the mean fluorescence intensity (MFI) of the expression of P-sp in A/MCF-7 cells with various concentrations of SL at 20  $\mu$ M DOX. Data are showed as Mean  $\pm$  SD by t-test (n=3).

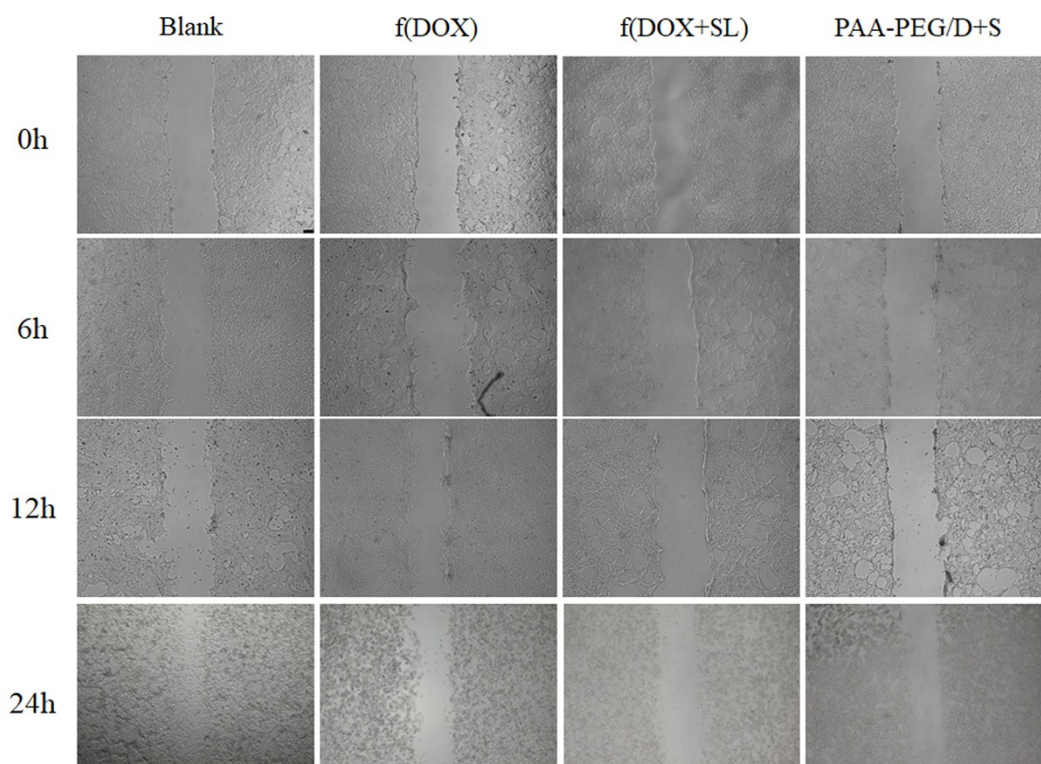

**Figure S6.** Typical images of wound-healing response showed the change of scratch wound in 4T1 cells after treatment with various formulations for 0, 6, 12 and 24 h. (Scale bars: 100  $\mu$ m).
